# Supplementary material
Source: PubMed Central journal article supplement (PMC1750888)
Supplement: pnas_0609603103_1.pdf [file pnas_0609603103_1.pdf]

Table 2. The primers used in RFLP analysis, SSCP analysis and sequencing.

| <i>Species</i>          | <i>Analysis</i>     | <i>Name</i> | <i>Sequence</i>                 | <i>Direction</i> |
|-------------------------|---------------------|-------------|---------------------------------|------------------|
| <i>B. attramentaria</i> | Sequencing          | CO1-bf      | 5'-GGGGCTCCTGATATAGCTTTTCC-3'   | Forward          |
|                         |                     | CO1-br      | 5'-TAATATAGAAGTGTGCTTTTAGT-3'   | Reverse          |
| HL1, HL6                | RFLP and Sequencing | JB3         | 5'-TTTTTTGGGCATCCTGAGGTTTAT-3'  | Forward          |
|                         |                     | CO1-R trema | 5'-CAACAAATCATGATGCAAAAGG-3'    | Reverse          |
| HL1                     | SSCP                | SH1F1       | 5'-TCAACGCTAACTAACAATGACTC-3'   | Forward          |
|                         |                     | SH1R1       | 5'-CCCCAGTAGTAAACAGAAC-3'       | Reverse          |
|                         |                     | SH1F2       | 5'-CATGATACATGGTTTGTAGTGGC-3'   | Forward          |
|                         |                     | SH1R2       | 5'-CGCCATCGTGTTAATTCAGTAAA-3'   | Reverse          |
| HL6                     | SSCP                | SH6F1       | 5'-GCACTCTAACTAATAAAGATTTCGC-3' | Forward          |
|                         |                     | SH6R1       | 5'-CAAGAATCCATCATACAACCGGAT-3'  | Reverse          |
|                         |                     | SH6F2       | 5'-GGATCTTACAGGACAGTTGTTA-3'    | Forward          |
|                         |                     | SH6R2       | 5'-CCAACAGCTATAGACTCTCACA-3'    | Reverse          |
