# Supplementary material
Source: PubMed Central journal article supplement (PMC1750888)
Supplement: pnas_0609603103_2.pdf [file pnas_0609603103_2.pdf]

Table 3. The list of *P*-value for *t*-test of the comparisons of the diversity indices between introduced region and native or source region.

| <i>Species</i>          | <i>Diversity indices</i> | <i>Calculations</i>    | <i>Regions</i>       | <i>n</i> | <i>t</i> | <i>P-value</i> |
|-------------------------|--------------------------|------------------------|----------------------|----------|----------|----------------|
| <i>B. attramentaria</i> | Haplotype diversity      | Average of populations | Introduced vs Native | 18       | 1.55     | 0.14           |
|                         |                          |                        | Introduced vs Source | 7        | 3.11     | 0.03           |
|                         |                          | Regional scale         | Introduced vs Native | 180      | 11.3     | <0.0001        |
|                         |                          |                        | Introduced vs Source | 70       | 3.69     | 0.0008         |
|                         | Haplotype richness       | Average of populations | Introduced vs Native | 18       | 1.43     | 0.17           |
|                         |                          |                        | Introduced vs Source | 7        | 2.25     | 0.07           |
|                         |                          | Regional scale         | Introduced vs Native | 60       | 1.79     | 0.079          |
|                         |                          |                        | Introduced vs Source | 60       | 4.75     | <0.0001        |
| HL6                     | Haplotype diversity      | Average of populations | Introduced vs Native | 14       | 9.31     | <0.0001        |
|                         |                          |                        | Introduced vs Source | 7        | 5.84     | 0.0021         |
|                         |                          | Regional scale         | Introduced vs Native | 428      | 15.4     | <0.0001        |
|                         |                          |                        | Introduced vs Source | 333      | 11.5     | <0.0001        |
|                         | Haplotype richness       | Average of populations | Introduced vs Native | 13       | 13.8     | <0.0001        |
|                         |                          |                        | Introduced vs Source | 7        | 13.3     | <0.0001        |
|                         |                          | Regional scale         | Introduced vs Native | 30       | 4.74     | 0.0003         |
|                         |                          |                        | Introduced vs Source | 30       | 4.00     | 0.0012         |
| HL1                     | Haplotype diversity      | Average of populations | Introduced vs Native | 14       | 0.96     | 0.36           |
|                         |                          |                        | Introduced vs Source | 7        | 0.73     | 0.5            |
|                         |                          | Regional scale         | Introduced vs Native | 230      | 0.04     | 0.97           |
|                         |                          |                        | Introduced vs Source | 182      | 0.14     | 0.89           |
|                         | Haplotype richness       | Average of populations | Introduced vs Native | 11       | 0.03     | 0.98           |
|                         |                          |                        | Introduced vs Source | 7        | 0.68     | 0.53           |
|                         |                          | Regional scale         | Introduced vs Native | 30       | 0.35     | 0.73           |
|                         |                          |                        | Introduced vs Source | 30       | 0.37     | 0.72           |
